# Supplementary material for: Nanosilver-loaded metal–organic framework UiO-66 with strong fungicidal activity
Source: Royal Society of Chemistry journal article supplement (doi:10.1039/d2me00233g), 2023-01-01
Supplement: d2me00233g1.pdf [file d2me00233g1.pdf]

## SUPPLEMENTARY INFORMATION FILE

### **Nanosilver-loaded metal-organic framework UiO-66 with strong fungicidal activity**

Carolina Chiericatti <sup>a</sup>, Luis A. Lozano <sup>b</sup>, Juan M. Zamaro <sup>b\*</sup>

<sup>a</sup> Cátedra de Microbiología, Facultad de Ingeniería Química, Universidad Nacional del Litoral, Santiago del Estero 2829 (3000) Santa Fe, Argentina

<sup>b</sup> Instituto de Investigaciones en Catálisis y Petroquímica, INCAPE (FIQ, UNL, CONICET) Santiago del Estero 2829 (3000), Santa Fe, Argentina

\*Contact author information:

E-mail: [zamaro@fiq.unl.edu.ar](mailto:zamaro@fiq.unl.edu.ar)

Full postal address: Santiago del Estero 2829 (3000) Santa Fe, Argentina

Phone and fax numbers: +54-0342-4536861

ORCID of the authors

Carolina Chiericatti: 0000-0002-2967-851

Luis A. Lozano: 0000-0003-4977-3445

Juan Manuel Zamaro: 0000-0001-9114-404X

|                      |                                                             |    |
|----------------------|-------------------------------------------------------------|----|
| <b>Figure S1</b>     | XRD of Ag/UiO-66 samples without heat treatment             | 3  |
| <b>Figure S2</b>     | TGA-dTGA and mass spectra                                   | 4  |
| <b>Figure S3</b>     | XRD samples with different post-synthetic treatments        | 5  |
| <b>Figure S4</b>     | FTIR of samples with different treatments                   | 6  |
| <b>Figure S5</b>     | Inhibition curve of <i>P. roqueforti</i> with Ag/UiO-66-DMF | 7  |
| <b>Figures S6-S8</b> | EDS analyses                                                | 8  |
| <b>Figure S9</b>     | N <sub>2</sub> adsorption-desorption isotherms              | 11 |

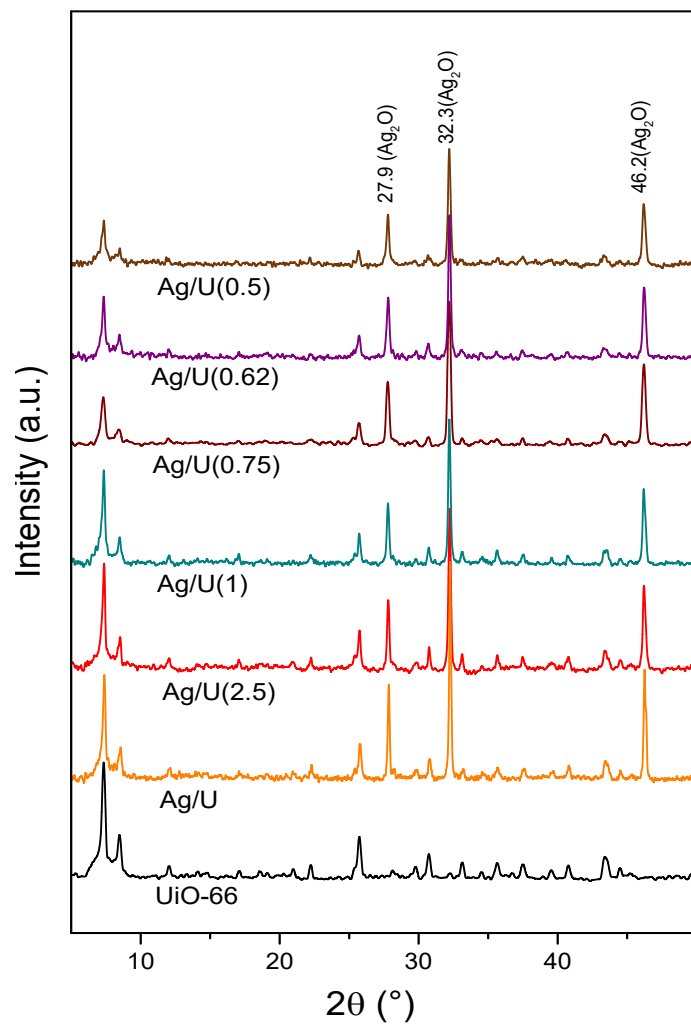

**Figure S1.** XRD of Ag/UiO-66 samples before the thermal treatment.

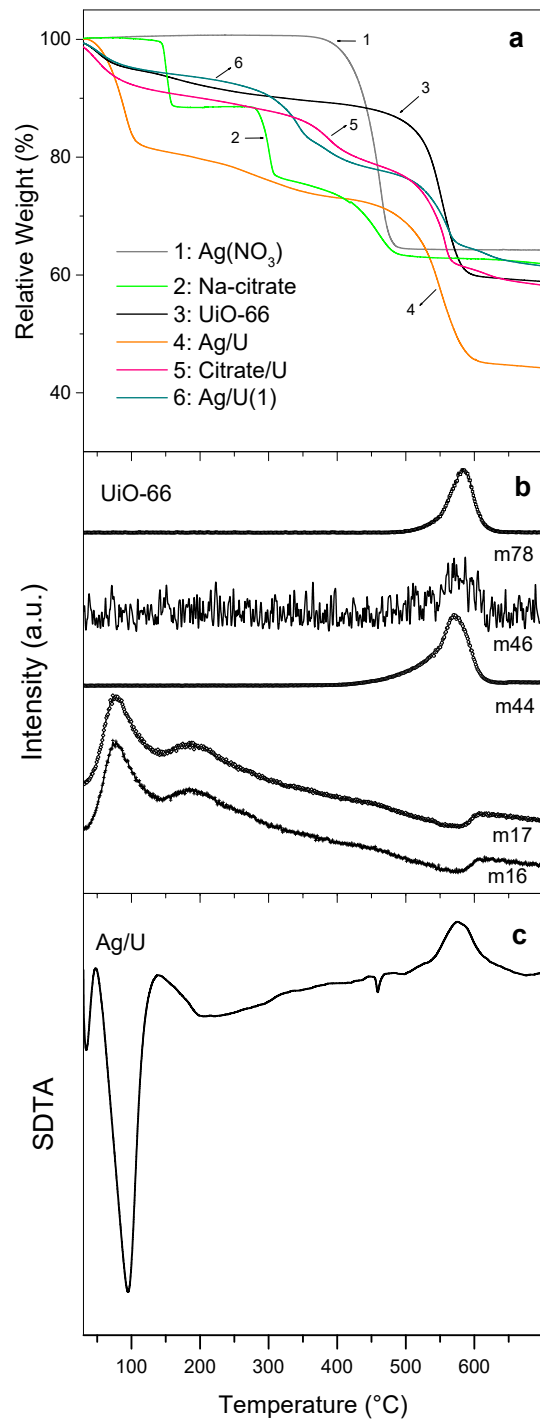

**Figure S2.** TGA-MS: a) TGA of Ag/UiO-66 and precursor samples, b) mass spectra of UiO-66. Note: m16 (O<sub>2</sub>, H<sub>2</sub>O); m17(OH, H<sub>2</sub>O); m44(CO<sub>2</sub>); m46(COOH of BDC); m78(C<sub>6</sub>H<sub>6</sub>), c) SDTA of Ag/U sample.

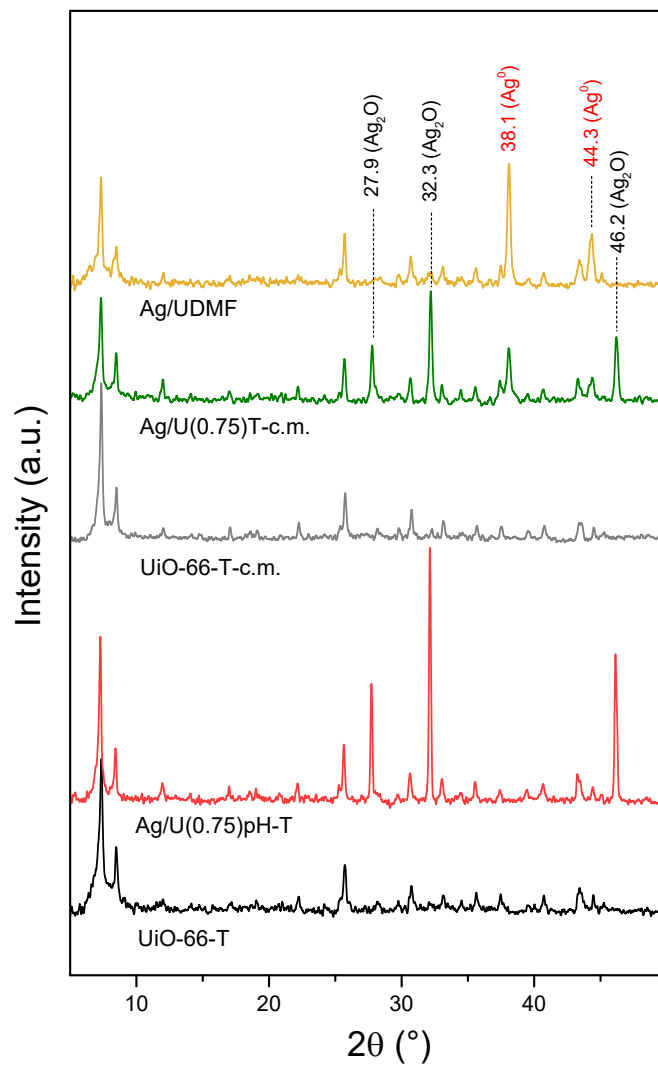

**Figure S3.** XRD samples with different post-synthetic treatments and exposed to the culture medium.

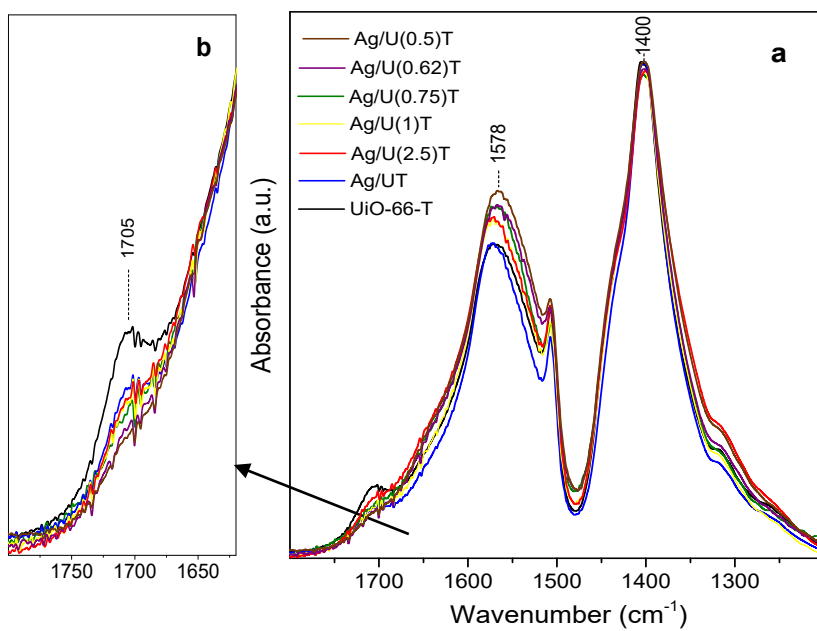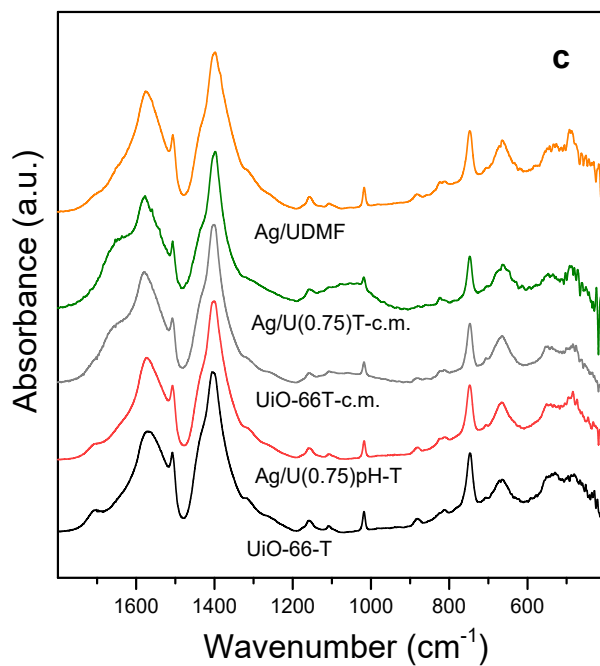

**Figure S4.** FTIR spectra: a) Ag/UiO-66 samples with different R values and thermally treated; b) close view in the COOH stretching region; c) Ag/UiO-66 and UiO-66 samples exposed to the culture medium and with different preparation treatments.

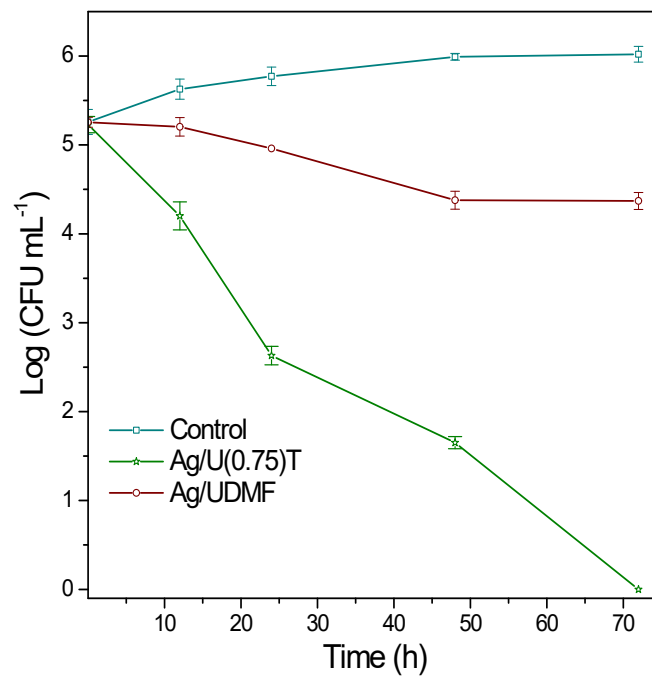

**Figure S5.** Colony growth curves (CFU mL<sup>-1</sup>) of *P. roqueforti* at different incubation times, using Ag/UiO-66-DMF and Ag/U(0.75)T samples.

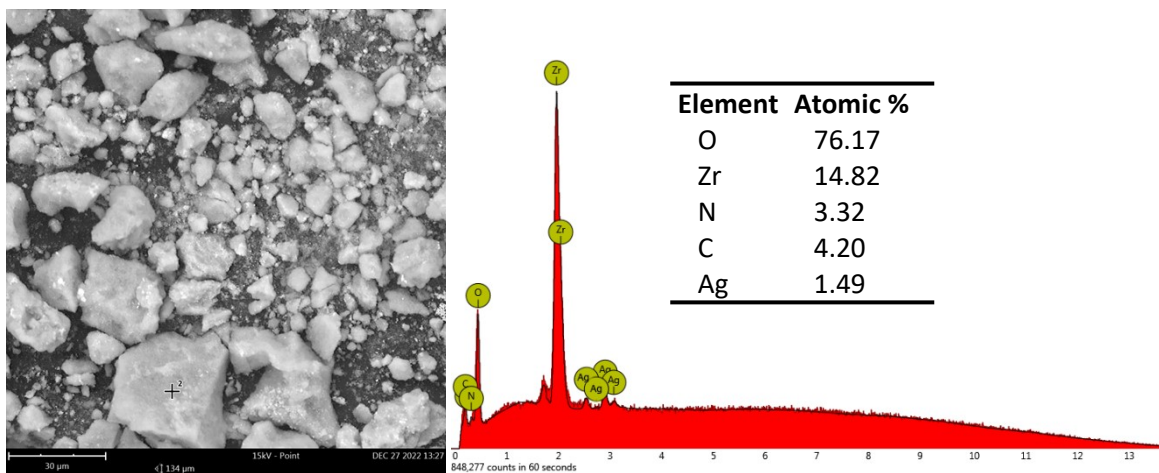

**Figure S6.** SEM-EDS analyses of Ag(0.75)/UT sample: a) image of the region analyzed; b) EDS spectrum and elemental quantification table in one of several points analyzed.



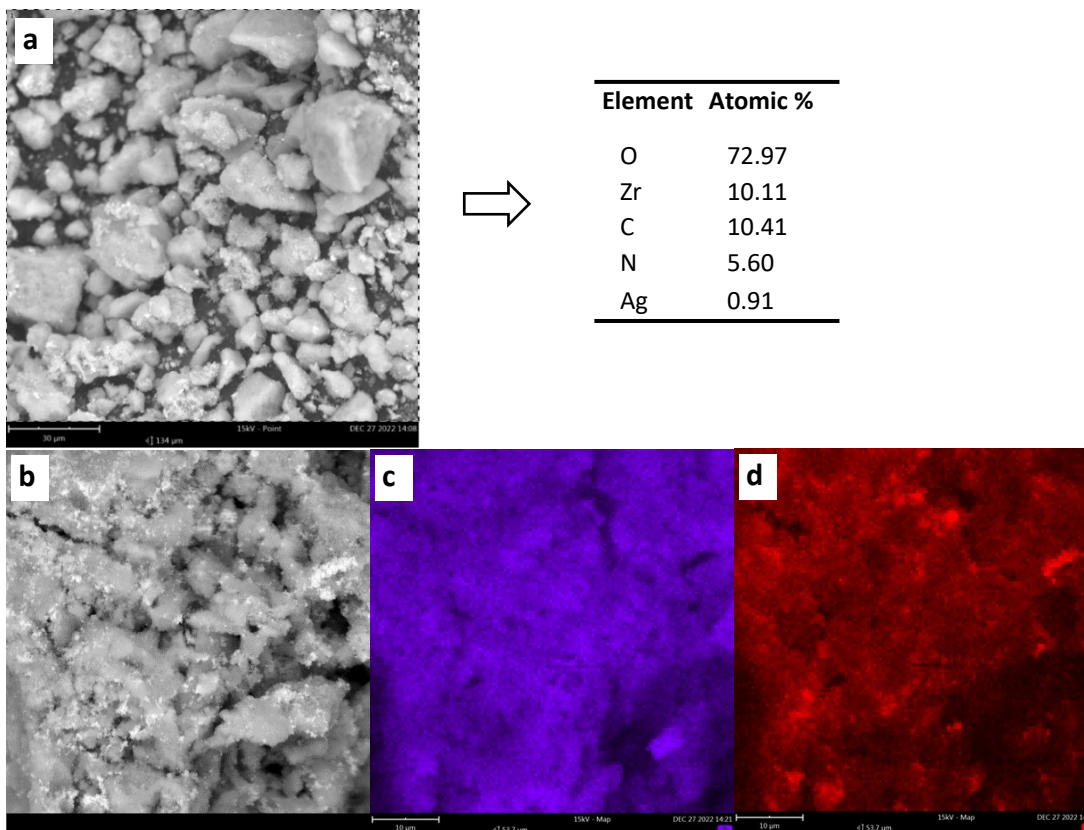

**Figure S7.** SEM-EDS analyses of the impregnated Ag(0.75)/U sample (before thermal treatment): a) image of the region analyzed (right side: elemental quantification table in the region analyzed); b) image of a sector analyzed by mapping; c) zirconium map; d) silver map.

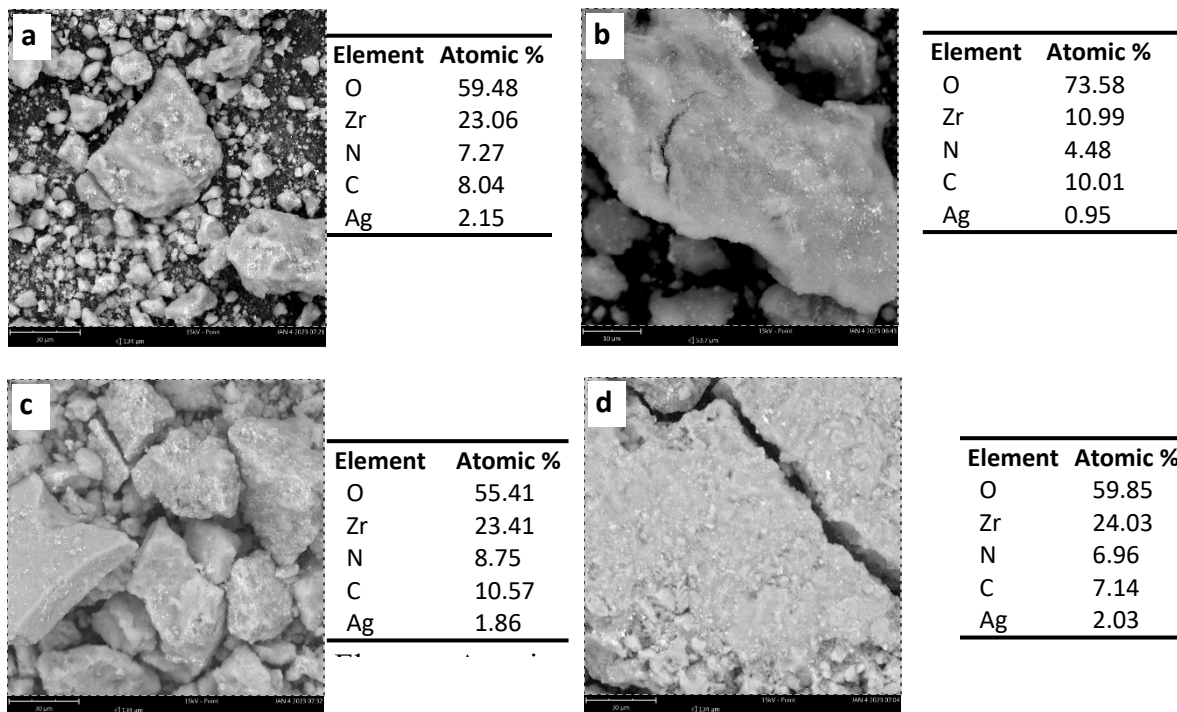

**Figure S8.** SEM-EDS analyzes performed on thermally-treated Ag/UiO-66 solids obtained with different proportions of nitrate/citrate: a) Ag/U(2.5)T; b) Ag/U(1)T; c) Ag/U(0.62)T; d) Ag/U(0.5)T.

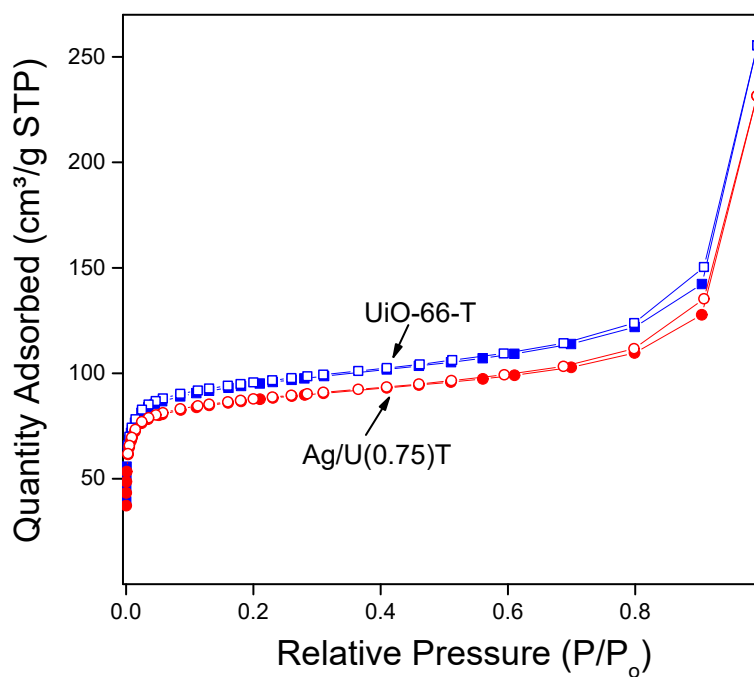

**Figure S9.** Adsorption-desorption isotherms of N<sub>2</sub> at 77 K: UiO-66 treated in He at 275 °C for 4h (square symbol and blue curve); Ag/U(0.75)T treated in He at 275 °C for 4h (circle symbol and red curve).
